# Supplementary material
Source: publisher site journal article supplement (https://www.dovepress.com/get_supplementary_file.php?f=453914.docx)
Supplement: Supplementary file 1 [file get_supplementary_file.php]

**Table S1 The positive rate of allergens was statistically correlated with the type of allergens.**

|  | **Chi-square test (**χ2**)** | **P-value** |
| --- | --- | --- |
|
| **Pearson** | 24585.249 | 0.000 |
| **Likelihood ratio** | 25150.643 | 0.000 |
| **Linear and linear combinations** | 17743.547 | 0.000 |
| **N in the valid case** | 53512 |  |
